# Supplementary material for: B4GALT1 as a New Biomarker of Idiopathic Pulmonary Fibrosis
Source: MDPI journal article supplement (doi:10.3390/ijms232315040), 2022-11-30
Supplement: s1 [file s1]

**Genes Involved in EMT pathway**

|         |          |        |          |           |
|---------|----------|--------|----------|-----------|
| ABI3BP  | CXCL1    | GPX7   | MMP14    | SERPINH1  |
| ACTA2   | CXCL12   | GREM1  | MMP2     | SFRP1     |
| ADAM12  | CXCL6    | HTRA1  | MMP3     | SFRP4     |
| ANPEP   | CCN1     | ID2    | MSX1     | SGCB      |
| APLP1   | DAB2     | IGFBP2 | MXRA5    | SGCD      |
| AREG    | DCN      | IGFBP3 | MYL9     | SGCG      |
| BASP1   | DKK1     | IGFBP4 | MYLK     | SLC6A8    |
| BDNF    | DPYSL3   | IL15   | NID2     | SLIT2     |
| BGN     | DST'ECM1 | IL32   | NNMT     | SLIT3     |
| BMP1    | ECM2     | IL6    | NOTCH2   | SNAI2     |
| CADM1   | EDIL3    | CXCL8  | NT5E     | SNTB1     |
| CALD1   | EFEMP2   | INHBA  | NTM      | SPARC     |
| CALU    | ELN      | ITGA2  | OXTR     | SPOCK1    |
| CAP2    | EMP3     | ITGA5  | PCOLCE   | SPP1      |
| CAPG    | ENO2     | ITGAV  | PCOLCE2  | TAGLN     |
| CD44    | FAP      | ITGB1  | PDGFRB   | TFPI2     |
| CD59    | FAS      | ITGB3  | PDLIM4   | TGFB1     |
| CDH11   | FBLN1    | ITGB5  | PFN2     | TGFBI     |
| CDH2    | FBLN2    | JUN    | PLAUR    | TGFBR3    |
| CDH6    | FBLN5    | LAMA1  | PLOD1    | TGM2      |
| COL11A1 | FBN1     | LAMA2  | PLOD2    | THBS1     |
| COL12A1 | FBN2     | LAMA3  | PLOD3    | THBS2     |
| COL16A1 | FERMT2   | LAMC1  | PMEPA1   | THY1      |
| COL1A1  | FGF2     | LAMC2  | PMP22    | TIMP1     |
| COL1A2  | FLNA     | P3H1   | POSTN    | TIMP3     |
| COL3A1  | FMOD     | LGALS1 | PPIB     | TNC       |
| COL4A1  | FN1      | LOX    | PRRX1    | TNFAIP3   |
| COL4A2  | FOXC2    | LOXL1  | PRSS2    | TNFRSF11B |
| COL5A1  | FSTL1    | LOXL2  | PTHLH    | TNFRSF12A |
| COL5A2  | FSTL3    | LRP1   | PTX3     | TPM1      |
| COL5A3  | FUCA1    | LRRC15 | PVR      | TPM2      |
| COL6A2  | FZD8     | LUM    | QSOX1    | TPM4      |
| COL6A3  | GADD45A  | MAGEE1 | RGS4     | VCAM1     |
| COL7A1  | GADD45B  | MATN2  | RHOB     | VCAN      |
| COL8A2  | GAS1     | MATN3  | SAT1     | VEGFA     |
| COMP    | GEM      | MCM7   | SCG2     | VEGFC     |
| COPA    | GJA1     | MEST   | SDC1     | VIM       |
| CRLF1   | GLIPR1   | MFAP5  | SDC4     | WIPF1     |
| CCN2    | COLGALT1 | MGP    | SERPINE1 | WNT5A     |
| CTHRC1  | GPC1     | MMP1   | SERPINE2 |           |
