# Supplementary figures and images for: B4GALT1 as a New Biomarker of Idiopathic Pulmonary Fibrosis
Source: MDPI journal article supplement (doi:10.3390/ijms232315040), 2022-11-30

Figure S2

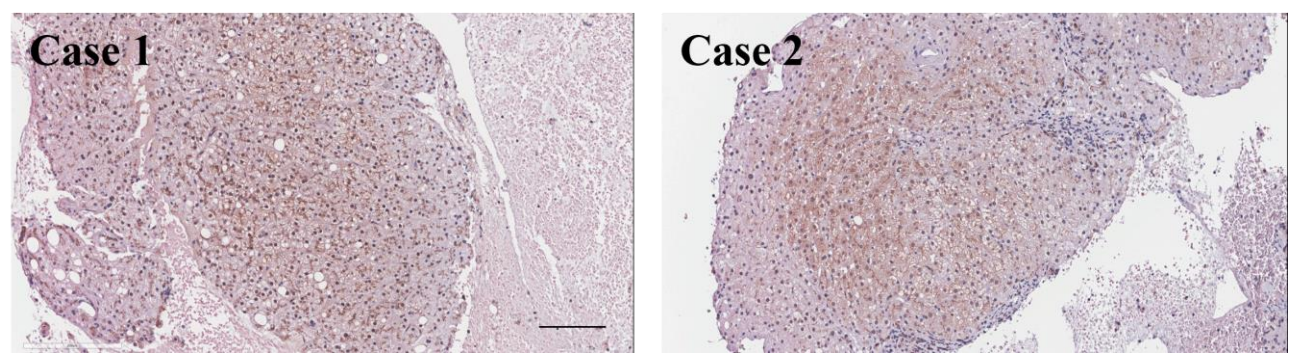

Supplement: s1 [file s1]

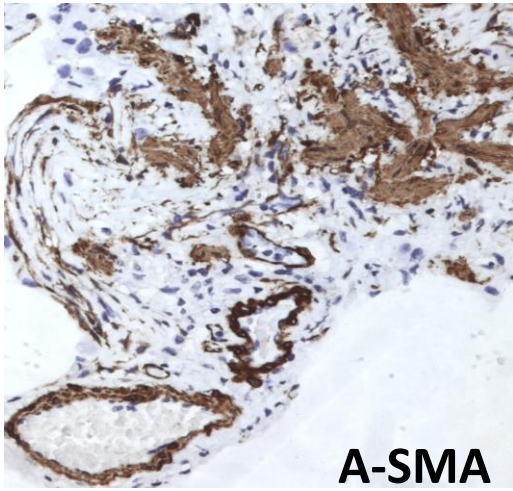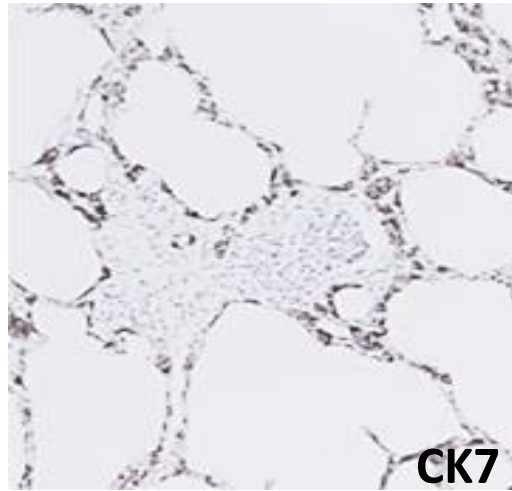

Supplement: s1 [file s1]
